# Supplementary material for: Crown ether-based covalent organic frameworks for CO2 fixation
Source: Royal Society of Chemistry journal article supplement (doi:10.1039/d2nj05372a), 2022-12-14
Supplement: d2nj05372a1.pdf [file d2nj05372a1.pdf]

# Supporting Information

## Crown ether-based covalent organic frameworks for CO<sub>2</sub> fixation

### **Table of Content**

**Section 1. Materials and Methods**

**Section 2. Experimental Procedures**

**Section 3. Solution <sup>1</sup>H NMR Spectra**

**Section 4. Chemical Stability Tests**

**Section 5. BET Tests**

**Section 6. EDS Test**

**Section 7. Catalytic Results**

**Section 8. Structural Simulation**

**Section 9. Supporting References**

## Section 1. Materials and Methods

All the chemicals and solvents were purchased commercially and used without further purification, unless otherwise noted. Liquid NMR spectra were recorded on a Bruker AVANCE III HD 400 MHz. The following abbreviations were used to explain the multiplicities: s = singlet, d = doublet, t = triplet, q = quartet, m = multiplet, dd = doublet of doublets. The solid  $^{13}\text{C}$  NMR spectra were measured on JEOL JNM ECZ600R 600MHz. Powder X ray diffraction (PXRD) data were collected on Rigaku Smartlab using Cu  $K\alpha$  radiation at 60 kV, 220 mA power. The Brunauer-Emmett-Teller (BET) surface areas were calculated by nitrogen adsorption and desorption at 77 K using ASAP2460 and the samples were activated under vacuum before analysis. Fourier transform infrared (FT-IR) spectra were obtained on Hitachi F-2500 spectrophotometer. A Scanning Electron Microscope (SEM) images were obtained with Hitachi S-4800. The conversion was analyzed by GC.

## Section 2. Experimental Procedures

### 2.1 Synthetic Procedures

#### Synthesis of $\text{B}_{18}\text{C}_6$ :

4,4',4'',4'''-(6,7,9,10,17,18,20,21-octahydrodibenzo [b,k] [1,4,7,10,13,16] hexaoxacyclooctadecine-2,3,13,14-tetrayl) tetrabenzaldehyde ( $\text{B}_{18}\text{C}_6$ ) was synthesized by using the Suzuki-Miyaura coupling reaction<sup>[1]</sup>. Bis(3,4-dibromobenzene)-18-crown-6 (0.2 mmol),  $\text{Pd}(\text{PPh}_3)_4$  (0.01 mmol) and  $\text{Cs}_2\text{CO}_3$  (1.0 mmol) were dispersed in THF (5.0 mL), and stirred for 10 min. 4-Methoxycarbonylphenyl boronic acid (1.6 mmol) dissolved in methanol (3.0 mL), was added to the solution, and heated at 90°C for 48 h. After being cooled to room temperature, the reaction solution was washed by saturated brine and extracted through methylene

chloride. The organic phase was dried over anhydrous  $\text{Na}_2\text{SO}_4$  and then concentrated under reduced pressure. The crude product was purified by column chromatography on silica gel (DCM: MeOH=15:1). The yield of  $\text{B}_{18}\text{C}_6$  was about 91%.  $^1\text{H}$  NMR (400 MHz, DMSO- $d_6$ )  $\delta$  9.95 (s, 4H), 7.77 (d,  $J = 8.2$  Hz, 8H), 7.34 (d,  $J = 8.1$  Hz, 8H), 7.08 (s, 4H), 4.24 (s, 8H), 3.89 (s, 8H).

### **Synthesis of ETТА-B<sub>18</sub>C<sub>6</sub>-COF:**

A pyrex tube (10 mL) is charged with ETТА (39.3 mg),  $\text{B}_{18}\text{C}_6$  (77.6 mg), 1.8 mL *o*-DCB, 3.6 mL n-butanol, 0.9 mL of 6 M aqueous acetic acid. The mixture was sonicated for 30 minutes. The tube was then flash frozen at 77K and degassed by three freeze-pump-thaw cycles. The tube was sealed off and then heated at 120°C for 3 days. The resulting yellow solid was isolated by centrifugation and washed with N,N-dimethylacetamide(3×10mL), acetone(3×10mL). The powder was dried at 100 °C under vacuum overnight to afford ETТА-B<sub>18</sub>C<sub>6</sub>-COF as yellow powder in about 91% yield.

### **2.2 Chemical Stability Tests**

Each COF sample (20mg) was immersed in 2 mL medium (DCM, THF, MeOH, 3.0 M NaOH and 1.0 M HCl) for 7 days. All the samples were isolated by centrifugation and washed with H<sub>2</sub>O (3×10mL), then activated at 100 °C under vacuum for 12 h.

### **2.3 Catalytic procedures**

The cycloaddition reactions were carried out in a Schlenk tube (10 mL) with a magnetic stirrer. In a typical procedure, the epoxide (1 mmol), COF (0.01 mmol) and TBAB (0.05 mmol) were added into a reaction tube. After sealing and purging with CO<sub>2</sub> using a balloon, the reaction tube was placed in a preheated oil bath and stirred for 24 h. After the cycloaddition reaction, the catalyst was separated from the system by filtration, and reaction mixture was analyzed by GC to

calculate the conversion of substrate.

### Section 3. Solution $^1\text{H}$ NMR Spectra

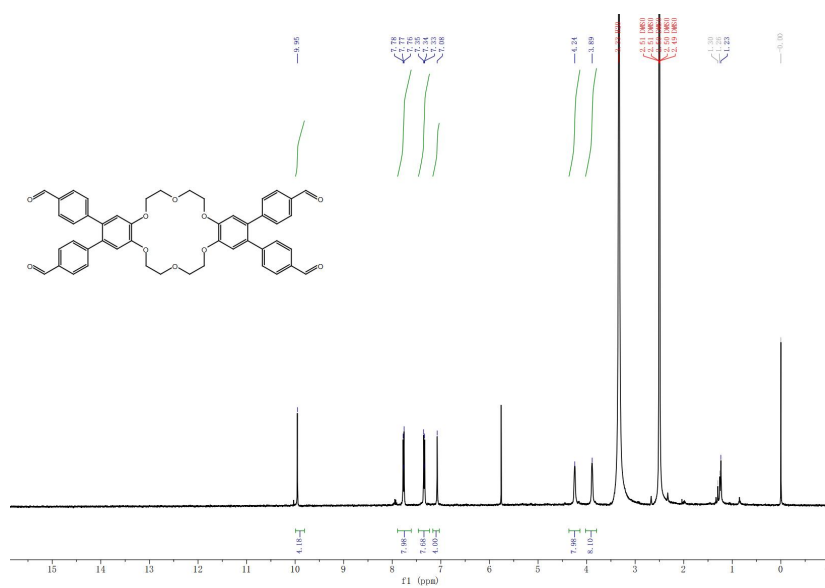

Figure S1.  $^1\text{H}$  NMR spectra of monomer B<sub>18</sub>C<sub>6</sub> in DMSO.

#### Section 4. Chemical Stability Tests

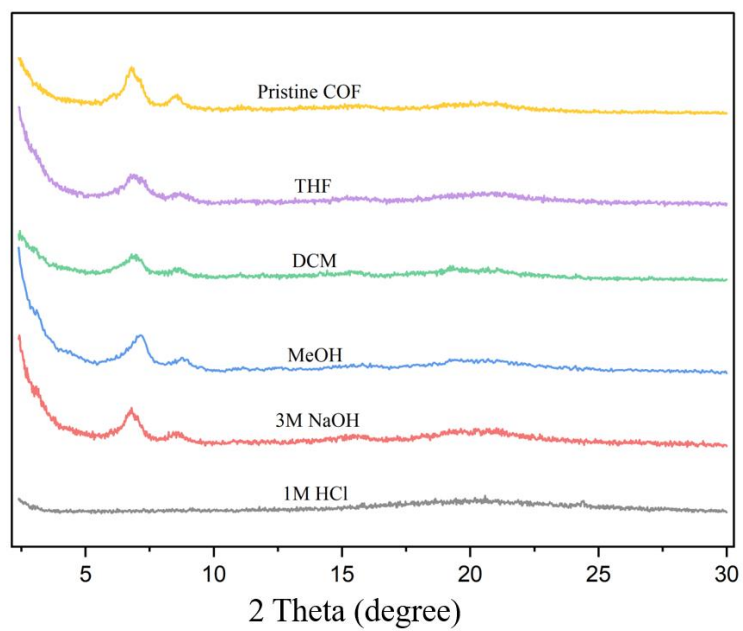

Figure S2. PXRD profiles of ETTA-B<sub>18</sub>C<sub>6</sub>-COF (yellow) after treatment for 7 days in THF (purple), DCM (green), MeOH (blue), 3M NaOH (red) and 1M HCl (gray)

## Section 5. BET Tests

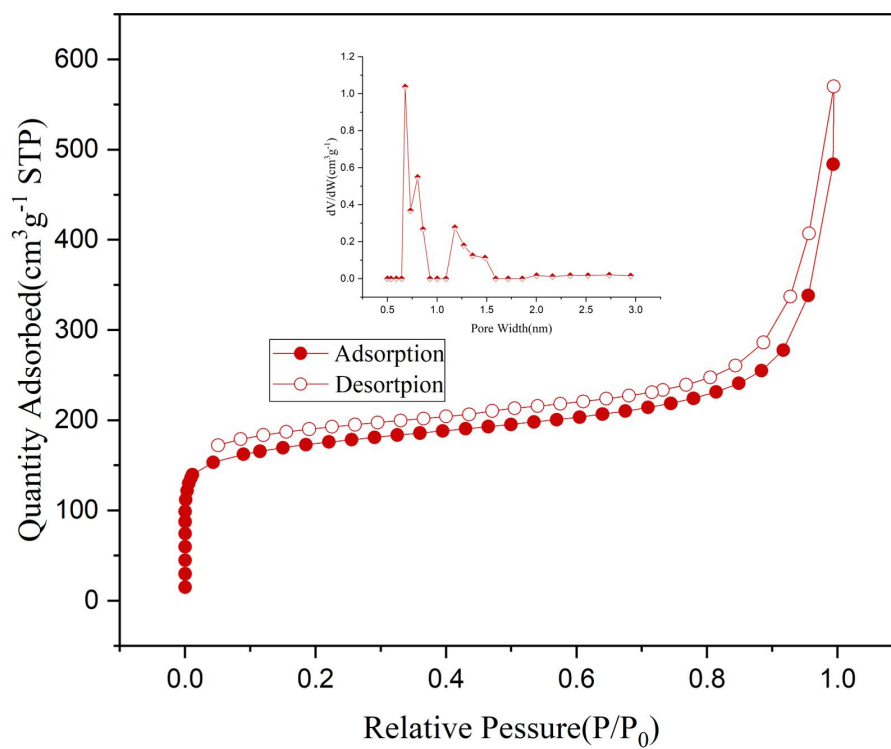

Figure S3. Nitrogen adsorption and desorption isotherms at 77 K and pore size distribution profiles for ET TA-B<sub>18</sub>C<sub>6</sub>COF

## Section 6. EDS Tests

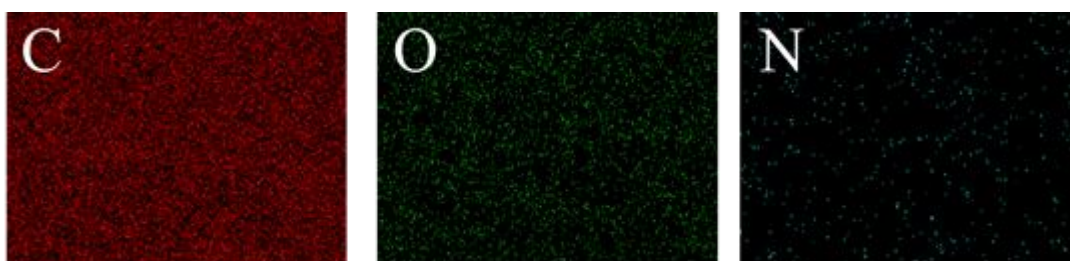

Figure S4. EDS mapping images of ET TA-B<sub>18</sub>C<sub>6</sub>COF

## Section 7. Catalytic Results

Table S1. Catalytic cycloaddition of CO<sub>2</sub> with 1,2-epoxybutane using ETТА-B<sub>18</sub>C<sub>6</sub>-COF<sup>a</sup>.

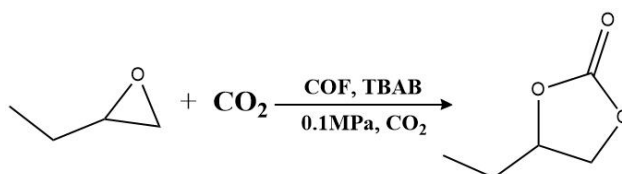

| Entry | Co-catalyst | Catalyst                                 | Time<br>[h] | Temperature<br>[°C] | Conversion <sup>b</sup><br>[%] | Selectivity <sup>b</sup><br>[%] |
|-------|-------------|------------------------------------------|-------------|---------------------|--------------------------------|---------------------------------|
| 1     | TBAB        | -                                        | 24          | 40                  | 38                             | >99                             |
| 2     | -           | ETТА-B <sub>18</sub> C <sub>6</sub> -COF | 24          | 40                  | -                              | -                               |
| 3     | TBAB        | B <sub>18</sub> C <sub>6</sub>           | 24          | 40                  | 77                             | >99                             |
| 4     | TBAB        | ETТА                                     | 24          | 40                  | 66                             | >99                             |
| 5     | TBAB        | ETТА-B <sub>18</sub> C <sub>6</sub> -COF | 24          | 40                  | 90                             | >99                             |
| 6     | TBAB        | ETТА-B <sub>18</sub> C <sub>6</sub> -COF | 6           | 40                  | 9                              | >99                             |
| 7     | TBAB        | ETТА-B <sub>18</sub> C <sub>6</sub> -COF | 12          | 40                  | 29                             | >99                             |
| 8     | TBAB        | ETТА-B <sub>18</sub> C <sub>6</sub> -COF | 18          | 40                  | 61                             | >99                             |
| 9     | TBAB        | ETТА-B <sub>18</sub> C <sub>6</sub> -COF | 30          | 40                  | 92                             | >99                             |
| 10    | TBAB        | ETТА-B <sub>18</sub> C <sub>6</sub> -COF | 24          | 30                  | 64                             | >99                             |
| 11    | TBAB        | ETТА-B <sub>18</sub> C <sub>6</sub> -COF | 24          | 50                  | 91                             | >99                             |

<sup>a</sup>Reaction conditions: 1,2-epoxybutane (1 mmol), TBAB (0.05 mmol), ETТА-B<sub>18</sub>C<sub>6</sub>-COF (0.01 mmol), CO<sub>2</sub> (0.1 MPa), solvent free; <sup>b</sup>Determined by GC.



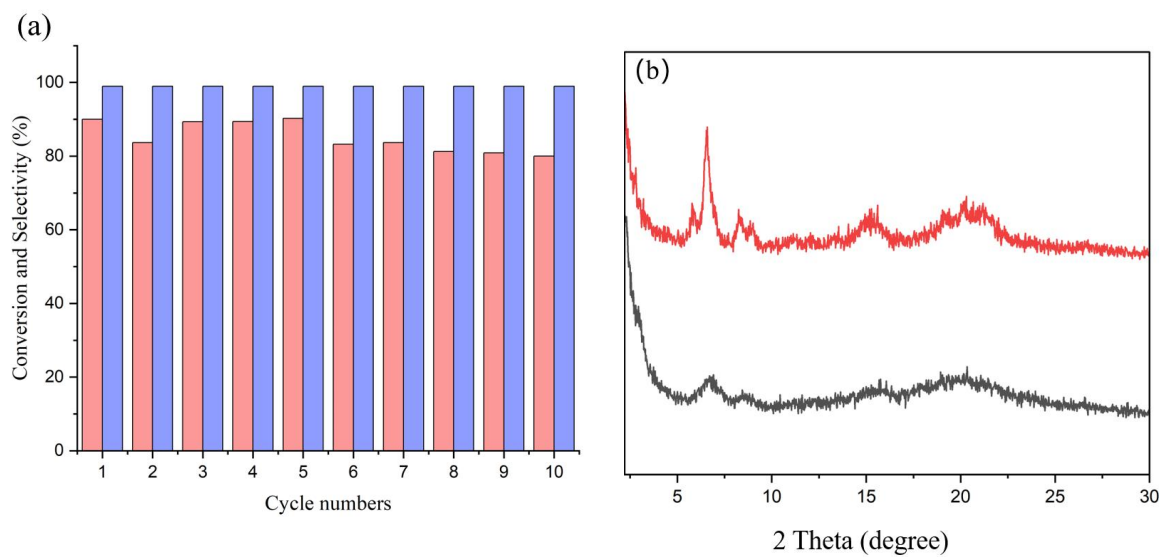

Figure S5. (a) Recycling catalytic test of ETTA-B<sub>18</sub>C<sub>6</sub>-COF for the CO<sub>2</sub> cycloaddition with 1,2-epoxybutane (1 mmol), solvent free, CO<sub>2</sub> (0.1 MPa), 40°C and 24 h. (b)PXRD curves of ETTA-B<sub>18</sub>C<sub>6</sub>-COF before (red) and after (black) ten runs.

Table S2. Summary of reported catalytic systems for coupling of CO<sub>2</sub> and epichlorohydrin under mild/ambient conditions.

| Material                                                        | Condition                 | TOF(h <sup>-1</sup> ) | Ref                                              |
|-----------------------------------------------------------------|---------------------------|-----------------------|--------------------------------------------------|
| Al-iPOP (0.1)/–                                                 | 25°C, 0.1 Mpa, 8 h        | 124                   | ChemSusChem. 2017, 10, 2534–2541.                |
| 2,3-DhaTph (0.2)/TBAI (0.5)                                     | 110°C, 1 Mpa, 12 h        | 39.2                  | Catal. Sci. Technol. 2016, 6, 6152–6158.         |
| PPS⊂COF-TpBpy-Cu (1.8)                                          | 40°C, 0.1Mpa, 24 h        | 23.9                  | J. Am. Chem. Soc. 2016, 138, 15790–15796.        |
| <b>ETTA-B<sub>18</sub>C<sub>6</sub>-COF (0.01) /TBAB (0.05)</b> | <b>40°C, 0.1Mpa, 24 h</b> | <b>3.9</b>            | <b>This work</b>                                 |
| COFJLU7(0.5)/TBAB (5.0)                                         | 40°C, 0.1Mpa, 48 h        | 3.8                   | J. Mater. Chem. A. 2018, 6, 374–382.             |
| Co-CMP (0.5) /TBAB (7.2)                                        | 25°C, 0.1Mpa, 48 h        | 3.4                   | Nat. Commun. 2013, 4, 1960–1965.                 |
| Pyridyl salicylimine (0.1)                                      | 100°C, 1 Mpa, 24 h        | 2.0                   | ACS Appl. Mater. Interfaces 2018, 10, 9478–9484. |
| Cr-MIL-101(1.2)/TBAB (3.4)                                      | 25°C, 0.8 Mpa, 48 h       | 1.6                   | <i>Catal.</i> 2013, 298, 179–185.                |
| Cr(salophen) complex (2.5)/TBAB (2.5)                           | 25°C, 0.1 Mpa, 24 h       | 1.6                   | ACS Catal. 2016, 6, 5012–5025.                   |
| USTC-253-TFA (1.0) /TBAB (6.5)                                  | 25 °C, 0.1 Mpa, 72 h      | 1.1                   | ChemSusChem. 2015, 8, 878–885.                   |
| Hf-NU-1000 (4.0) /TBAB (10)                                     | 25 °C, 0.1 Mpa, 56 h      | 0.1                   | J. Am. Chem. Soc. 2014, 136, 15861–15864.        |

## Section 8. Structural Simulation

Table S3a. Atomic space position of the AA-stacking mode of ET TA-B<sub>18</sub>C<sub>6</sub>-COF.

| Space group: P1                      |         |          |          |
|--------------------------------------|---------|----------|----------|
| a=28.8354Å, b=14.5041Å, c=4.4406Å    |         |          |          |
| α=91.6676°, β=94.93919°, γ=91.86846° |         |          |          |
| C1                                   | 0.12737 | -2.45474 | -0.21140 |
| O2                                   | 0.08770 | -2.50204 | -0.11154 |
| C3                                   | 0.09032 | -2.60006 | -0.12093 |
| C4                                   | 0.04661 | -2.64122 | 0.01261  |
| C5                                   | 0.16846 | -2.50062 | -0.29240 |
| C6                                   | 0.20835 | -2.45265 | -0.38121 |
| C7                                   | 0.25100 | -2.50788 | -0.42512 |
| C8                                   | 0.24987 | -2.58921 | -0.59649 |
| C9                                   | 0.28983 | -2.64311 | -0.62920 |
| C10                                  | 0.33124 | -2.61634 | -0.48883 |
| C11                                  | 0.33214 | -2.53674 | -0.31217 |
| C12                                  | 0.29225 | -2.48335 | -0.27850 |
| C13                                  | 0.37393 | -2.67042 | -0.51586 |
| N14                                  | 0.37696 | -2.74335 | -0.68375 |
| C15                                  | 0.41879 | -2.79654 | -0.70111 |
| C16                                  | 0.42016 | -2.87561 | -0.88123 |
| C17                                  | 0.46012 | -2.93048 | -0.88973 |
| C18                                  | 0.49892 | -2.90872 | -0.71160 |
| C19                                  | 0.49752 | -2.82787 | -0.53801 |
| C20                                  | 0.45815 | -2.77226 | -0.53334 |
| C21                                  | 0.54171 | -2.96762 | -0.70378 |
| C22                                  | 0.58640 | -2.91549 | -0.67732 |
| C23                                  | 0.53997 | -3.06270 | -0.70378 |
| C24                                  | 0.62193 | -2.94403 | -0.48231 |
| C25                                  | 0.66268 | -2.89271 | -0.45368 |
| C26                                  | 0.66810 | -2.81029 | -0.61243 |
| C27                                  | 0.63223 | -2.77961 | -0.80077 |
| C28                                  | 0.59195 | -2.83196 | -0.83336 |
| N29                                  | 0.70936 | -2.75719 | -0.56860 |
| C30                                  | 0.58276 | -3.12160 | -0.71158 |
| C31                                  | 0.49528 | -3.11482 | -0.67733 |
| C32                                  | 0.45974 | -3.08629 | -0.48233 |
| C33                                  | 0.41899 | -3.13760 | -0.45371 |
| C34                                  | 0.41358 | -3.22002 | -0.61247 |
| C35                                  | 0.44944 | -3.25071 | -0.80080 |
| C36                                  | 0.48973 | -3.19836 | -0.83337 |
| C37                                  | 0.58416 | -3.20244 | -0.53797 |
| C38                                  | 0.62352 | -3.25806 | -0.53328 |
| C39                                  | 0.66289 | -3.23377 | -0.70104 |
| C40                                  | 0.66152 | -3.15470 | -0.88116 |
| C41                                  | 0.62156 | -3.09983 | -0.88969 |

|     |         |          |          |
|-----|---------|----------|----------|
| N42 | 0.70472 | -3.28697 | -0.68366 |
| N43 | 0.37231 | -3.27312 | -0.56865 |
| C44 | 0.36524 | -3.35196 | -0.69817 |
| C45 | 0.70775 | -3.35989 | -0.51576 |
| C46 | 0.71643 | -2.67835 | -0.69810 |
| C47 | 0.75844 | -2.62468 | -0.63814 |
| C48 | 0.75044 | -3.41398 | -0.48872 |
| C49 | 0.32324 | -3.40563 | -0.63822 |
| C50 | 0.79342 | -2.65873 | -0.45010 |
| C51 | 0.83155 | -2.60364 | -0.37863 |
| C52 | 0.83530 | -2.5135  | -0.49212 |
| C53 | 0.80106 | -2.48184 | -0.69123 |
| C54 | 0.76268 | -2.53653 | -0.76155 |
| C55 | 0.74954 | -3.49358 | -0.31207 |
| C56 | 0.78943 | -3.54696 | -0.27840 |
| C57 | 0.83068 | -3.52243 | -0.42501 |
| C58 | 0.83181 | -3.44110 | -0.59637 |
| C59 | 0.79185 | -3.38721 | -0.62908 |
| C60 | 0.28825 | -3.37158 | -0.45017 |
| C61 | 0.25012 | -3.42667 | -0.37871 |
| C62 | 0.24637 | -3.51681 | -0.49219 |
| C63 | 0.28061 | -3.54847 | -0.69131 |
| C64 | 0.31899 | -3.49378 | -0.76163 |
| C65 | 0.87490 | -2.45427 | -0.39733 |
| C66 | 0.87333 | -3.57767 | -0.38111 |
| C67 | 0.20678 | -3.57604 | -0.39740 |
| C68 | 0.91592 | -2.49906 | -0.31164 |
| C69 | 0.95539 | -2.45055 | -0.21593 |
| C70 | 0.95431 | -3.57558 | -0.21133 |
| C71 | 0.91323 | -3.52970 | -0.29230 |
| C72 | 0.16576 | -3.53126 | -0.31166 |
| C73 | 0.12629 | -3.57977 | -0.21595 |
| O74 | 0.99587 | -2.49559 | -0.11780 |
| C75 | 0.99342 | -2.59369 | -0.10856 |
| C76 | 1.03731 | -2.63261 | 0.02961  |
| O77 | 1.07508 | -2.61516 | -0.15799 |
| O78 | 0.99398 | -3.52829 | -0.11146 |
| C79 | 0.99136 | -3.43027 | -0.12075 |
| C80 | 1.03507 | -3.38913 | 0.01280  |
| O81 | 1.07351 | -3.41517 | -0.15784 |
| O82 | 0.08581 | -3.53475 | -0.11778 |
| C83 | 0.08826 | -3.43664 | -0.10845 |
| C84 | 0.04437 | -3.39773 | 0.02976  |
| H85 | 0.02167 | -2.61522 | -0.16756 |
| H86 | 0.36558 | -2.51514 | -0.19473 |
| H87 | 0.40629 | -2.64891 | -0.38620 |
| H88 | 0.38867 | -2.89565 | -1.02196 |
| H89 | 0.46145 | -2.99363 | -1.04234 |
| H90 | 0.52893 | -2.80687 | -0.39797 |

|      |         |          |          |
|------|---------|----------|----------|
| H91  | 0.45779 | -2.70653 | -0.39256 |
| H92  | 0.61774 | -3.00986 | -0.34473 |
| H93  | 0.69170 | -2.91806 | -0.30024 |
| H94  | 0.63595 | -2.71170 | -0.92780 |
| H95  | 0.56300 | -2.80709 | -0.98819 |
| H96  | 0.46394 | -3.02045 | -0.34475 |
| H97  | 0.38997 | -3.11225 | -0.30027 |
| H98  | 0.44573 | -3.31861 | -0.92784 |
| H99  | 0.51868 | -3.22323 | -0.98819 |
| H100 | 0.55275 | -3.22345 | -0.39795 |
| H101 | 0.62389 | -3.32378 | -0.39249 |
| H102 | 0.69301 | -3.13467 | -1.02188 |
| H103 | 0.62023 | -3.03669 | -1.04231 |
| H104 | 0.39199 | -3.38073 | -0.86221 |
| H105 | 0.67636 | -3.38427 | -0.38154 |
| H106 | 0.68968 | -2.64958 | -0.86214 |
| H107 | 0.73477 | -2.50922 | -0.91992 |
| H108 | 0.71610 | -3.51518 | -0.19464 |
| H109 | 0.29087 | -3.29875 | -0.35516 |
| H110 | 0.34691 | -3.52109 | -0.92000 |
| H111 | 1.04121 | -2.64483 | 0.28194  |
| H112 | 1.03938 | -3.40893 | 0.25967  |

---

Table S3b. Atomic space position of the AB-stacking mode of ET TA-B<sub>18</sub>C<sub>6</sub>-COF.

| <b>Space group: P1</b>                                                                                        |         |         |         |
|---------------------------------------------------------------------------------------------------------------|---------|---------|---------|
| <b>a=29.2648Å, b=15.0158Å, c=8.8932Å</b>                                                                      |         |         |         |
| <b><math>\alpha=87.9297^\circ</math>, <math>\beta=92.6375^\circ</math>, <math>\gamma=91.9377^\circ</math></b> |         |         |         |
| C1                                                                                                            | 0.77044 | 0.56102 | 0.40617 |
| O2                                                                                                            | 0.73077 | 0.51372 | 0.45610 |
| C3                                                                                                            | 0.73340 | 0.41570 | 0.45141 |
| C4                                                                                                            | 0.68968 | 0.37454 | 0.51817 |
| C5                                                                                                            | 0.81153 | 0.51514 | 0.36567 |
| C6                                                                                                            | 0.85142 | 0.56311 | 0.32127 |
| C7                                                                                                            | 0.89407 | 0.50788 | 0.29931 |
| C8                                                                                                            | 0.89294 | 0.42655 | 0.21363 |
| C9                                                                                                            | 0.93290 | 0.37265 | 0.19727 |
| C10                                                                                                           | 0.97432 | 0.39942 | 0.26746 |
| C11                                                                                                           | 0.97521 | 0.47902 | 0.35579 |
| C12                                                                                                           | 0.93532 | 0.53241 | 0.37262 |
| C13                                                                                                           | 0.01700 | 0.34534 | 0.25394 |
| N14                                                                                                           | 0.02003 | 0.27241 | 0.17000 |
| C15                                                                                                           | 0.06187 | 0.21922 | 0.16132 |
| C16                                                                                                           | 0.06324 | 0.14015 | 0.07126 |
| C17                                                                                                           | 0.10320 | 0.08528 | 0.06701 |
| C18                                                                                                           | 0.14199 | 0.10704 | 0.15607 |
| C19                                                                                                           | 0.14059 | 0.18789 | 0.24287 |
| C20                                                                                                           | 0.10123 | 0.24350 | 0.24520 |
| C21                                                                                                           | 0.18478 | 0.04815 | 0.15998 |
| C22                                                                                                           | 0.22947 | 0.10027 | 0.17321 |
| C23                                                                                                           | 0.18304 | 0.95306 | 0.15998 |
| C24                                                                                                           | 0.26501 | 0.07173 | 0.27072 |
| C25                                                                                                           | 0.30576 | 0.12305 | 0.28503 |
| C26                                                                                                           | 0.31117 | 0.20547 | 0.20566 |
| C27                                                                                                           | 0.27531 | 0.23615 | 0.11149 |
| C28                                                                                                           | 0.23502 | 0.18380 | 0.09519 |
| N29                                                                                                           | 0.35244 | 0.25857 | 0.22757 |
| C30                                                                                                           | 0.22583 | 0.89416 | 0.15608 |
| C31                                                                                                           | 0.13835 | 0.90094 | 0.17321 |
| C32                                                                                                           | 0.10282 | 0.92947 | 0.27071 |
| C33                                                                                                           | 0.06206 | 0.87816 | 0.28501 |
| C34                                                                                                           | 0.05665 | 0.79574 | 0.20564 |
| C35                                                                                                           | 0.09252 | 0.76505 | 0.11147 |
| C36                                                                                                           | 0.13280 | 0.81740 | 0.09519 |
| C37                                                                                                           | 0.22723 | 0.81332 | 0.24289 |
| C38                                                                                                           | 0.26660 | 0.75770 | 0.24523 |
| C39                                                                                                           | 0.30596 | 0.78199 | 0.16135 |
| C40                                                                                                           | 0.30459 | 0.86106 | 0.07129 |
| C41                                                                                                           | 0.26463 | 0.91593 | 0.06703 |
| N42                                                                                                           | 0.34780 | 0.72879 | 0.17004 |
| N43                                                                                                           | 0.01538 | 0.74264 | 0.22755 |

|     |         |         |          |
|-----|---------|---------|----------|
| C44 | 0.00831 | 0.66380 | 0.16279  |
| C45 | 0.35082 | 0.65587 | 0.25399  |
| C46 | 0.35951 | 0.33741 | 0.16282  |
| C47 | 0.40151 | 0.39108 | 0.19280  |
| C48 | 0.39351 | 0.60178 | 0.26751  |
| C49 | 0.96631 | 0.61013 | 0.19276  |
| C50 | 0.43650 | 0.35703 | 0.28682  |
| C51 | 0.47462 | 0.41212 | 0.32256  |
| C52 | 0.47837 | 0.50226 | 0.26581  |
| C53 | 0.44414 | 0.53392 | 0.16626  |
| C54 | 0.40576 | 0.47923 | 0.13110  |
| C55 | 0.39261 | 0.52218 | 0.35583  |
| C56 | 0.43251 | 0.46880 | 0.37267  |
| C57 | 0.47375 | 0.49333 | 0.29937  |
| C58 | 0.47488 | 0.57466 | 0.21369  |
| C59 | 0.43492 | 0.62855 | 0.19733  |
| C60 | 0.93132 | 0.64418 | 0.28679  |
| C61 | 0.89320 | 0.58909 | 0.32252  |
| C62 | 0.88945 | 0.49895 | 0.26578  |
| C63 | 0.92368 | 0.46729 | 0.16622  |
| C64 | 0.96206 | 0.52198 | 0.13106  |
| C65 | 0.51797 | 0.56149 | 0.31321  |
| C66 | 0.51641 | 0.43809 | 0.32132  |
| C67 | 0.84985 | 0.43972 | 0.31317  |
| C68 | 0.55899 | 0.51670 | 0.35605  |
| C69 | 0.59846 | 0.56521 | 0.40391  |
| C70 | 0.59738 | 0.44018 | 0.40621  |
| C71 | 0.55630 | 0.48606 | 0.36572  |
| C72 | 0.80883 | 0.48450 | 0.35604  |
| C73 | 0.76936 | 0.43599 | 0.40390  |
| O74 | 0.63895 | 0.52017 | 0.45297  |
| C75 | 0.63649 | 0.42207 | 0.45759  |
| C76 | 0.68038 | 0.38315 | 0.52668  |
| O77 | 0.71815 | 0.40060 | 0.43288  |
| O78 | 0.63706 | 0.48747 | 0.45614  |
| C79 | 0.63443 | 0.58549 | 0.45150  |
| C80 | 0.67815 | 0.62664 | 0.51827  |
| O81 | 0.71659 | 0.60059 | 0.43295  |
| O82 | 0.72888 | 0.48101 | 0.45298  |
| C83 | 0.73133 | 0.57912 | 0.45765  |
| C84 | 0.68745 | 0.61803 | 0.52675  |
| H85 | 0.66474 | 0.40054 | 0.42809  |
| H86 | 0.00865 | 0.50062 | 0.41450  |
| H87 | 0.04936 | 0.36685 | 0.31877  |
| H88 | 0.03174 | 0.12011 | 0.00089  |
| H89 | 0.10452 | 0.02213 | -0.00930 |
| H90 | 0.17200 | 0.20889 | 0.31288  |
| H91 | 0.10086 | 0.30923 | 0.31559  |
| H92 | 0.26081 | 0.00590 | 0.33951  |

|      |         |         |          |
|------|---------|---------|----------|
| H93  | 0.33477 | 0.09770 | 0.36175  |
| H94  | 0.27902 | 0.30406 | 0.04797  |
| H95  | 0.20607 | 0.20867 | 0.01778  |
| H96  | 0.10701 | 0.99531 | 0.33950  |
| H97  | 0.03305 | 0.90351 | 0.36174  |
| H98  | 0.08881 | 0.69715 | 0.04795  |
| H99  | 0.16175 | 0.79253 | 0.01777  |
| H100 | 0.19582 | 0.79231 | 0.31290  |
| H101 | 0.26696 | 0.69198 | 0.31563  |
| H102 | 0.33608 | 0.88109 | 0.00093  |
| H103 | 0.26331 | 0.97907 | -0.00928 |
| H104 | 0.03506 | 0.63503 | 0.08077  |
| H105 | 0.31943 | 0.63149 | 0.32110  |
| H106 | 0.33276 | 0.36618 | 0.08080  |
| H107 | 0.37784 | 0.50654 | 0.05191  |
| H108 | 0.35918 | 0.50058 | 0.41455  |
| H109 | 0.93394 | 0.71701 | 0.33429  |
| H110 | 0.98998 | 0.49467 | 0.05187  |
| H111 | 0.68429 | 0.37093 | 0.65284  |
| H112 | 0.68245 | 0.60683 | 0.64170  |
| C113 | 0.12737 | 0.54526 | 0.89430  |
| O114 | 0.08770 | 0.49796 | 0.94423  |
| C115 | 0.09032 | 0.39994 | 0.93954  |
| C116 | 0.04661 | 0.35878 | 1.00630  |
| C117 | 0.16846 | 0.49938 | 0.85380  |
| C118 | 0.20835 | 0.54735 | 0.80940  |
| C119 | 0.25100 | 0.49212 | 0.78744  |
| C120 | 0.24987 | 0.41079 | 0.70176  |
| C121 | 0.28983 | 0.35689 | 0.68540  |
| C122 | 0.33124 | 0.38366 | 0.75559  |
| C123 | 0.33214 | 0.46326 | 0.84391  |
| C124 | 0.29225 | 0.51665 | 0.86075  |
| C125 | 0.37393 | 0.32958 | 0.74207  |
| N126 | 0.37696 | 0.25665 | 0.65812  |
| C127 | 0.41879 | 0.20346 | 0.64944  |
| C128 | 0.42016 | 0.12439 | 0.55939  |
| C129 | 0.46012 | 0.06952 | 0.55513  |
| C130 | 0.49892 | 0.09128 | 0.64420  |
| C131 | 0.49752 | 0.17213 | 0.73100  |
| C132 | 0.45815 | 0.22774 | 0.73333  |
| C133 | 0.54171 | 0.03238 | 0.64811  |
| C134 | 0.58640 | 0.08451 | 0.66134  |
| C135 | 0.53997 | 0.93730 | 0.64811  |
| C136 | 0.62193 | 0.05597 | 0.75885  |
| C137 | 0.66268 | 0.10729 | 0.77316  |
| C138 | 0.66810 | 0.18971 | 0.69379  |
| C139 | 0.63223 | 0.22039 | 0.59962  |
| C140 | 0.59195 | 0.16804 | 0.58332  |
| N141 | 0.70936 | 0.24281 | 0.71570  |



|      |         |         |         |
|------|---------|---------|---------|
| C142 | 0.58276 | 0.87840 | 0.64421 |
| C143 | 0.49528 | 0.88518 | 0.66133 |
| C144 | 0.45974 | 0.91371 | 0.75884 |
| C145 | 0.41899 | 0.86240 | 0.77314 |
| C146 | 0.41358 | 0.77998 | 0.69376 |
| C147 | 0.44944 | 0.74929 | 0.59960 |
| C148 | 0.48973 | 0.80164 | 0.58331 |
| C149 | 0.58416 | 0.79756 | 0.73101 |
| C150 | 0.62352 | 0.74194 | 0.73336 |
| C151 | 0.66289 | 0.76623 | 0.64948 |
| C152 | 0.66152 | 0.84530 | 0.55942 |
| C153 | 0.62156 | 0.90017 | 0.55515 |
| N154 | 0.70472 | 0.71303 | 0.65817 |
| N155 | 0.37231 | 0.72688 | 0.71567 |
| C156 | 0.36524 | 0.64804 | 0.65092 |
| C157 | 0.70775 | 0.64011 | 0.74212 |
| C158 | 0.71643 | 0.32165 | 0.65095 |
| C159 | 0.75844 | 0.37532 | 0.68093 |
| C160 | 0.75044 | 0.58602 | 0.75564 |
| C161 | 0.32324 | 0.59437 | 0.68089 |
| C162 | 0.79342 | 0.34127 | 0.77495 |
| C163 | 0.83155 | 0.39636 | 0.81068 |
| C164 | 0.83530 | 0.48650 | 0.75394 |
| C165 | 0.80106 | 0.51816 | 0.65438 |
| C166 | 0.76268 | 0.46347 | 0.61922 |
| C167 | 0.74954 | 0.50642 | 0.84396 |
| C168 | 0.78943 | 0.45304 | 0.86080 |
| C169 | 0.83068 | 0.47757 | 0.78749 |
| C170 | 0.83181 | 0.55890 | 0.70181 |
| C171 | 0.79185 | 0.61279 | 0.68546 |
| C172 | 0.28825 | 0.62842 | 0.77491 |
| C173 | 0.25012 | 0.57333 | 0.81065 |
| C174 | 0.24637 | 0.48319 | 0.75391 |
| C175 | 0.28061 | 0.45153 | 0.65435 |
| C176 | 0.31899 | 0.50622 | 0.61919 |
| C177 | 0.87490 | 0.54573 | 0.80133 |
| C178 | 0.87333 | 0.42233 | 0.80944 |
| C179 | 0.20678 | 0.42396 | 0.80130 |
| C180 | 0.91592 | 0.50094 | 0.84418 |
| C181 | 0.95539 | 0.54945 | 0.89203 |
| C182 | 0.95431 | 0.42442 | 0.89434 |
| C183 | 0.91323 | 0.47030 | 0.85385 |
| C184 | 0.16576 | 0.46874 | 0.84417 |
| C185 | 0.12629 | 0.42023 | 0.89202 |
| O186 | 0.99587 | 0.50441 | 0.94110 |
| C187 | 0.99342 | 0.40631 | 0.94572 |
| C188 | 0.03731 | 0.36739 | 1.01480 |
| O189 | 0.07508 | 0.38484 | 0.92100 |
| O190 | 0.99398 | 0.47171 | 0.94427 |

|      |         |         |         |
|------|---------|---------|---------|
| C191 | 0.99136 | 0.56973 | 0.93963 |
| C192 | 0.03507 | 0.61087 | 1.00640 |
| O193 | 0.07351 | 0.58483 | 0.92108 |
| O194 | 0.08581 | 0.46525 | 0.94111 |
| C195 | 0.08826 | 0.56336 | 0.94577 |
| C196 | 0.04437 | 0.60227 | 1.01488 |
| H197 | 0.02167 | 0.38478 | 0.91622 |
| H198 | 0.36558 | 0.48486 | 0.90263 |
| H199 | 0.40629 | 0.35109 | 0.80690 |
| H200 | 0.38867 | 0.10435 | 0.48902 |
| H201 | 0.46145 | 0.00637 | 0.47883 |
| H202 | 0.52893 | 0.19313 | 0.80101 |
| H203 | 0.45779 | 0.29347 | 0.80372 |
| H204 | 0.61774 | 0.99014 | 0.82763 |
| H205 | 0.69170 | 0.08194 | 0.84988 |
| H206 | 0.63595 | 0.28830 | 0.53610 |
| H207 | 0.56300 | 0.19291 | 0.50591 |
| H208 | 0.46394 | 0.97955 | 0.82762 |
| H209 | 0.38997 | 0.88775 | 0.84986 |
| H210 | 0.44573 | 0.68139 | 0.53608 |
| H211 | 0.51868 | 0.77677 | 0.50590 |
| H212 | 0.55275 | 0.77655 | 0.80102 |
| H213 | 0.62389 | 0.67622 | 0.80375 |
| H214 | 0.69301 | 0.86533 | 0.48906 |
| H215 | 0.62023 | 0.96331 | 0.47885 |
| H216 | 0.39199 | 0.61927 | 0.56890 |
| H217 | 0.67636 | 0.61573 | 0.80923 |
| H218 | 0.68968 | 0.35042 | 0.56893 |
| H219 | 0.73477 | 0.49078 | 0.54004 |
| H220 | 0.71610 | 0.48482 | 0.90268 |
| H221 | 0.29087 | 0.70125 | 0.82242 |
| H222 | 0.34691 | 0.47891 | 0.54000 |
| H223 | 0.04121 | 0.35517 | 1.14097 |
| H224 | 0.03938 | 0.59107 | 1.12983 |

---

## Section 9. Supporting References

- (1). D.W. Lim, S. A. Chyun, M. P. Suh, Hydrogen storage in a potassium-ion-bound metal–organic framework incorporating crown ether struts as specific cation binding sites. *Angew. Chem. Int. Ed.* 2014, 53, 7819-7822.
